# Supplementary material
Source: Springer Nature journal article supplement (https://www.springermedizin.de/resource/supplementary/12958_2009_509_MOESM3_ESM.pdf/9568176)
Supplement: MOESM3 [file 9568176]

**A**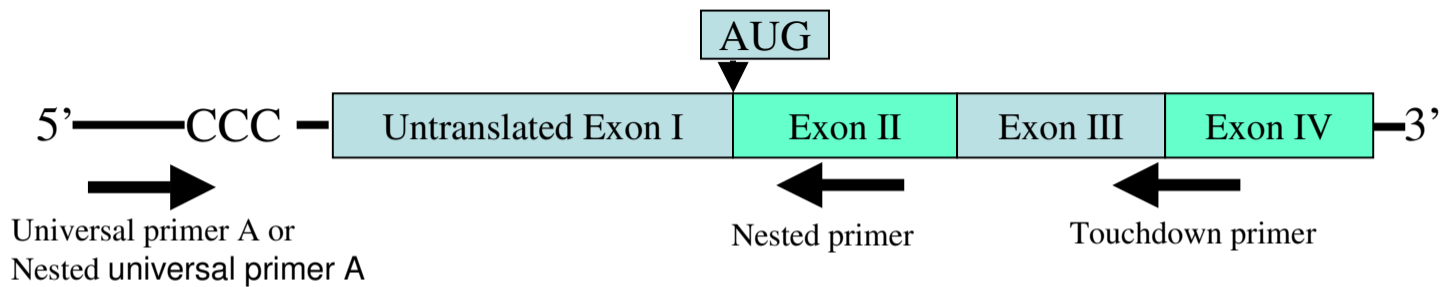**B**

aattccaggatgggatgctggccttggctgtagggggcatacacatctggagcctggccggaggtctttgttctggtcagcacaccaactcagGCCAAATAGCGCAAGATG

↑  
common splice site
